# Supplementary material for: Intracellular Porphyromonas gingivalis Promotes the Proliferation of Colorectal Cancer Cells via the MAPK/ERK Signaling Pathway
Source: PubMed Central journal article supplement (PMC7785964; doi:10.3389/fcimb.2020.584798), 2020-12-23
Supplement: DataSheet_2.pdf [file DataSheet_2.pdf]

**Supplementary Figure 3.**
**A.**
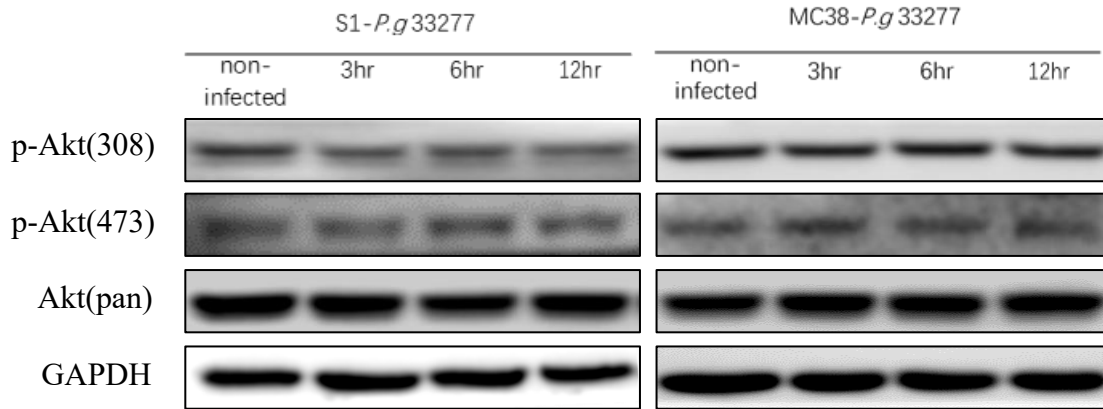
**B.**
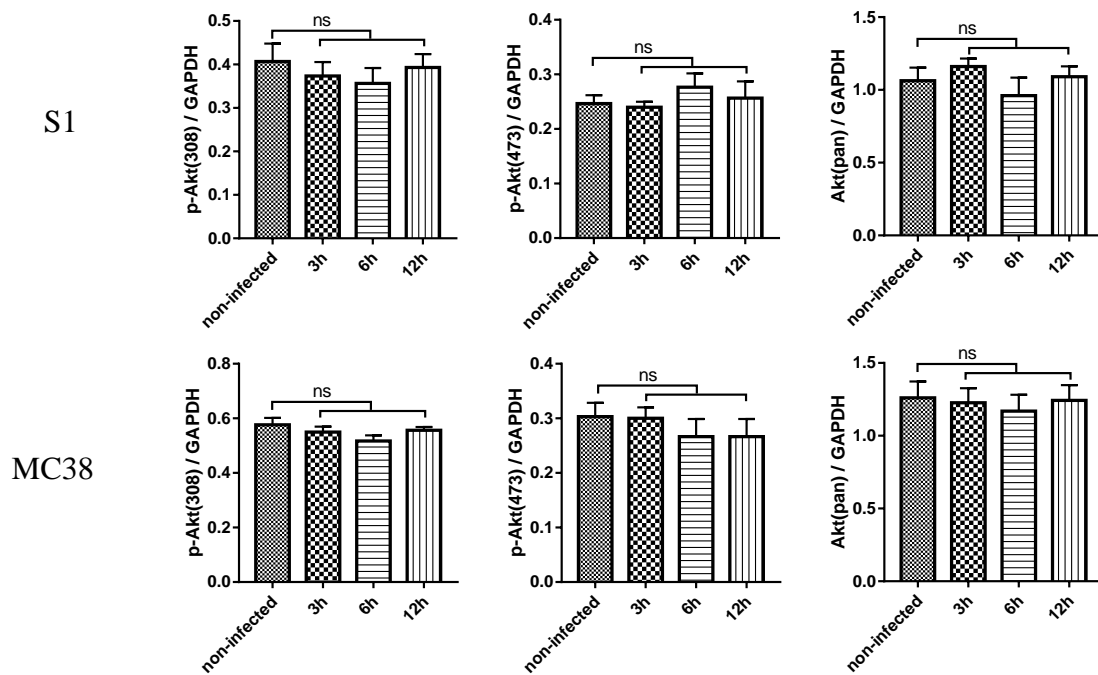

**Supplementary Figure 3.** The expression of PI3K-AKT pathway related protein. **(A-B)** Western blot was performed to detect the expression of p-Akt (308), p-Akt (473) and Akt (pan) in S1 cells and MC38 cells at 3h, 6h, and 12h after infection. ns, non-significant.
