# Supplementary material for: Intracellular Porphyromonas gingivalis Promotes the Proliferation of Colorectal Cancer Cells via the MAPK/ERK Signaling Pathway
Source: PubMed Central journal article supplement (PMC7785964; doi:10.3389/fcimb.2020.584798), 2020-12-23
Supplement: DataSheet_4.pdf [file DataSheet_4.pdf]

Supplementary Figure 5.

A.

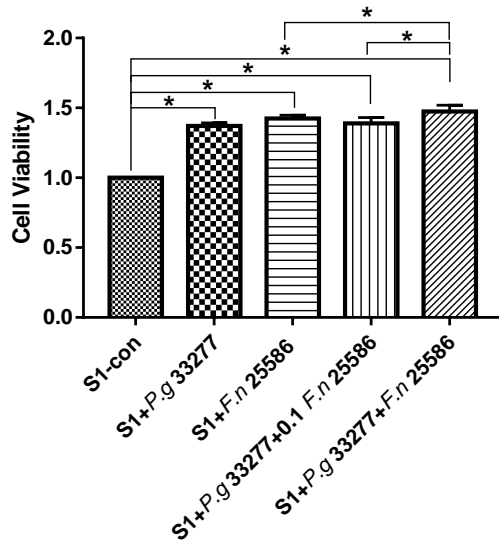

B.

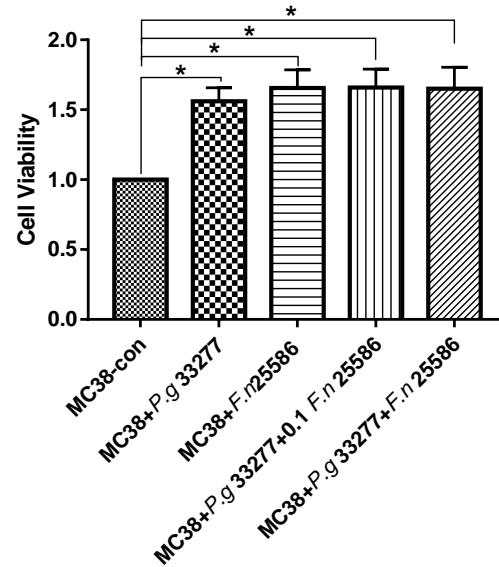

**Supplementary Figure 5.** Cell counting kit-8 (CCK8) results of S1 and MC38 pretreated with *P. gingivalis* and *F. nucleatum* for 24 h. CRC cells were incubated with *P. gingivalis* 33277 and *F. nucleatum* 25586 at a MOI of 100. Expectedly, the MOI in “0.1 *F. nucleatum* 25586” group is 10. *F. nucleatum* 25586 was purchased from ATCC. \* $P < 0.05$ .
