# Supplementary material for: Intracellular Porphyromonas gingivalis Promotes the Proliferation of Colorectal Cancer Cells via the MAPK/ERK Signaling Pathway
Source: PubMed Central journal article supplement (PMC7785964; doi:10.3389/fcimb.2020.584798), 2020-12-23
Supplement: DataSheet_5.pdf [file DataSheet_5.pdf]

**Supplementary Table 1.** Sequence of primers used for human and mouse genes

| Gene         | Specie | Forward primer         | Reverse primer          |
|--------------|--------|------------------------|-------------------------|
| <i>KRAS</i>  | Human  | GGACTGGGGAGGGCTTTCT    | GCCTGTTTTGTGTCTACTGTTCT |
|              | Mouse  | CAAGAGCGCCTTGACGATACA  | CAAGAGCGCCTTGACGATACA   |
| <i>BRAF</i>  | Human  | AATACACCAGCAAGCTAGATGC | AATCAGTCCGTTCCCCAGAG    |
|              | Mouse  | ATTTGGTGGAGAGCATAACCCA | ATTTGGTGGAGAGCATAACCCA  |
| <i>MEK2</i>  | Human  | CCAAGGTCGGCGAACTCAAA   | TCTCAAGGTGGATCAGCTTCC   |
|              | Mouse  | GTTACCGGCACTCACTATCAAC | GTTACCGGCACTCACTATCAAC  |
| <i>ERK2</i>  | Human  | TACACCAACCTCTCGTACATCG | CATGTCTGAAGCGCAGTAAGATT |
|              | Mouse  | GGTTGTTCCCAAATGCTGACT  | GGTTGTTCCCAAATGCTGACT   |
| <i>C-FOS</i> | Human  | CCGGGGATAGCCTCTTACT    | CCAGGTCCGTGCAGAAGTC     |
|              | Mouse  | CGGGTTTCAACGCCGACTA    | TGGCACTAGAGACGGACAGAT   |
| <i>API</i>   | Human  | TCCAAGTGCCGAAAAAGGAAG  | CGAGTCTGAGCTTCAAGGT     |
|              | Mouse  | TTCCTCCAGTCCGAGAGCG    | TGAGAAGGTCCGAGTTCTTGG   |
| <i>GAPDH</i> | Human  | GGAGCGAGATCCCTCCAAAAT  | GGCTGTTGTCATACTTCTCATGG |
|              | Mouse  | AGGTCGGTGTGAACGGATTTG  | AGGTCGGTGTGAACGGATTTG   |
