# Supplementary material for: Intracellular Porphyromonas gingivalis Promotes the Proliferation of Colorectal Cancer Cells via the MAPK/ERK Signaling Pathway
Source: PubMed Central journal article supplement (PMC7785964; doi:10.3389/fcimb.2020.584798), 2020-12-23
Supplement: DataSheet_7.pdf [file DataSheet_7.pdf]

**Supplementary Table 3.** The comparisons of “KDP136 vs *P.g* 33277”

|                 | <b>Log2 Fold Change</b> | <b>Adjusted P-Value</b> |
|-----------------|-------------------------|-------------------------|
| <b>Akt1</b>     | 1.0932165               | 1.5075E-16              |
| <b>Braf</b>     | -0.0785576              | 0.91056532              |
| <b>Fos</b>      | 0.16372824              | 0.86337824              |
| <b>Map2k1</b>   | 0.00147582              | 0.99818093              |
| <b>Map2k3</b>   | -0.1035612              | 0.87795605              |
| <b>Map2k6</b>   | 0.32874768              | 0.64105081              |
| <b>Map3k13</b>  | -0.8034716              | 0.36837429              |
| <b>Map3k2</b>   | -0.008773               | 0.99078603              |
| <b>Map3k4</b>   | -0.122308               | 0.85471833              |
| <b>Map3k8</b>   | 0.0709853               | 0.94068406              |
| <b>Map4k2</b>   | 0.15516613              | 0.83354955              |
| <b>Mapk1</b>    | 0.03323438              | 0.96725652              |
| <b>Mapk7</b>    | -0.0826144              | 0.90035865              |
| <b>Mapk8</b>    | -0.0043229              | 0.99614534              |
| <b>Mapk8ip1</b> | 0.48487065              | 0.4376388               |
| <b>Mapk8ip3</b> | 0.28339984              | 0.68047222              |
| <b>Mapk9</b>    | 0.08735837              | 0.90479934              |
| <b>Trp53</b>    | 2.3158481               | 1.1678E-66              |
| <b>Raf1</b>     | 1.038101                | 6.6648E-19              |
