# Supplementary material for: Intracellular Porphyromonas gingivalis Promotes the Proliferation of Colorectal Cancer Cells via the MAPK/ERK Signaling Pathway
Source: PubMed Central journal article supplement (PMC7785964; doi:10.3389/fcimb.2020.584798), 2020-12-23
Supplement: DataSheet_8.pdf [file DataSheet_8.pdf]

**Supplementary Figure 2.**
**A.**
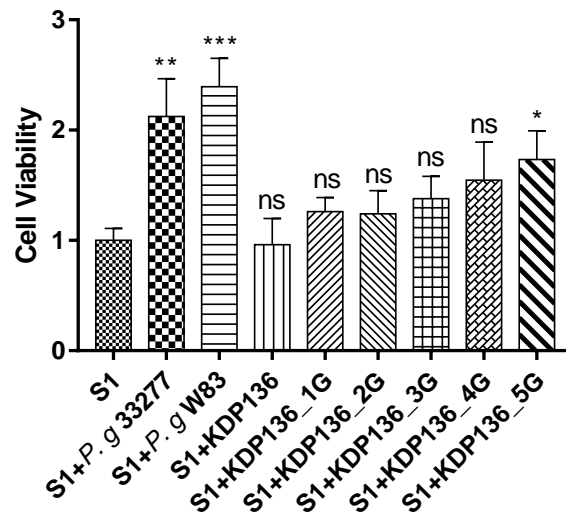
**B.**
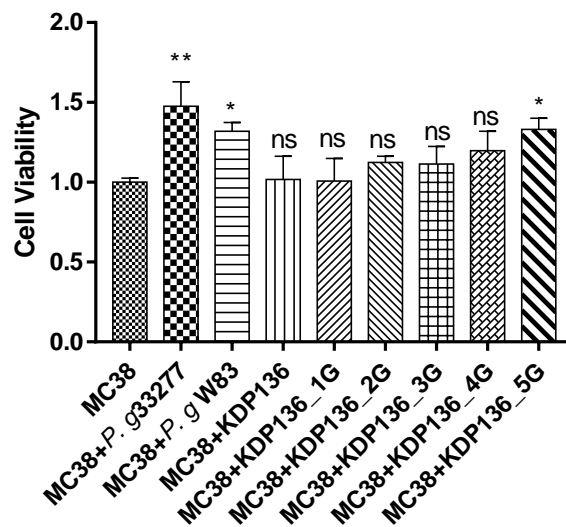

**Supplementary Figure 2.** Cell proliferation of colorectal cancer cells pretreated with *P. gingivalis* 33277, *P. gingivalis* W83, KDP136 and exogenous gingipains. (A-B) Cell counting kit-8 assay indicates that *P. gingivalis* 33277 and W83 can promote the proliferation of CRC cells and KDP136 lose the ability. However, the cell vitality of KDP136 group with exogenous gingipains (5 U/L) is significantly higher than control group. Cells were co-cultured with *P. gingivalis* at a MOI of 100 for 24 h and the exogenous gingipains were added at 0 h with different concentrations of 1, 2, 3, 4 and 5 U/L. U/L, unit/L. \* $P < 0.05$ , \*\* $P < 0.01$ . ns, nonsignificant.
